# The role of hidden hearing loss in tinnitus: insights from early markers of peripheral hearing damage

Pauline Devolder<sup>1,2</sup>, Hannah Keppler<sup>2,3</sup>, Sarineh Keshishzadeh, Baziel Taghon, Ingeborg Dhooge<sup>3,4</sup>, Sarah Verhulst<sup>1</sup>

<sup>1</sup> *Hearing Technology @ WAVES, Department of Information Technology, Ghent University, Zwijnaarde, Belgium*

<sup>2</sup> *Department of Rehabilitation Sciences, Ghent University, Ghent, Belgium*

<sup>3</sup> *Department of Ear, Nose and Throat, Ghent University Hospital, Ghent, Belgium*

<sup>4</sup> *Department of Head and Skin, Ghent University, Ghent, Belgium*

Corresponding author:

- [Pauline.Devolder@UGent.be](mailto:Pauline.Devolder@UGent.be)
- Technologiepark 126, 9050 Zwijnaarde, Belgium

Declarations of interest: none

## Abstract

Since the presence of tinnitus is not always associated with audiometric hearing loss, it has been hypothesized that hidden hearing loss may act as a potential trigger for increased central gain along the neural pathway leading to tinnitus perception. In recent years, the study of hidden hearing loss has improved with the discovery of cochlear synaptopathy and several objective diagnostic markers. This study investigated three potential markers of peripheral hidden hearing loss in subjects with tinnitus: extended high-frequency audiometric thresholds, the auditory brainstem response, and the envelope following response. In addition, speech intelligibility was measured as a functional outcome measurement of hidden hearing loss. To account for age-related hidden hearing loss, participants were grouped according to age, presence of tinnitus, and audiometric thresholds. Group comparisons were conducted to differentiate between age- and tinnitus-related effects of hidden hearing loss. All three markers revealed age-related differences, whereas no differences were observed between the tinnitus and non-tinnitus groups. However, the older tinnitus group showed improved performance on low-pass filtered speech in noise tests compared to the older non-tinnitus group. These low-pass speech in noise scores were significantly correlated with tinnitus distress, as indicated using questionnaires, and could be related to the presence of hyperacusis. Based on our observations, cochlear synaptopathy does not appear to be the underlying cause of tinnitus. The improvement in low-pass speech-in-noise could be explained by enhanced temporal fine structure encoding or hyperacusis. Therefore, we recommend that future tinnitus research takes into account age-related factors, explores low-frequency encoding, and thoroughly assesses hyperacusis.

## Keywords

Tinnitus, Hidden hearing loss, Cochlear synaptopathy, Speech perception, Hyperacusis

## 1 Introduction

Tinnitus is defined as the conscious awareness of a tonal or composite noise for which there is no identifiable corresponding external acoustic source (De Ridder et al., 2021) and affects 11.9% to 30.3% of the population (Hackenberg et al., 2023; Jarach et al., 2022; McCormack et al., 2016). Due to the heterogeneity of tinnitus, it remains challenging to identify its underlying mechanisms (Cederroth et al., 2019). Theories of tinnitus are often divided into bottom-up and top-down models, with bottom-up models attempting to provide an explanation based on peripheral hearing loss as a trigger and top-down models focusing on the maintenance of tinnitus perception at the cortical level. A combination of the two is generally assumed, as originally proposed by Jastreboff (1990) in the ‘neurophysiological model’ and later extended in the ‘increased central noise model’ (Zeng, 2013) or the ‘interacting neural networks model’ (De Ridder et al., 2014), among other models. One of the bottom-up models is the central gain enhancement theory, in which increased neural activity through the auditory pathway would compensate for reduced input due to peripheral hearing loss (Auerbach et al., 2014; Roberts & Salvi, 2019). In the majority of patients, peripheral hearing loss is visible in the audiogram. However, 8 to 10% of tinnitus patients have normal audiograms at conventional frequencies (Sanchez et al., 2005; Schaette & McAlpine, 2011). In those cases, hidden hearing loss is considered a possible explanation for the generation of tinnitus.

A possible pathophysiological explanation for hidden hearing loss is cochlear synaptopathy (CS); damage to synapses between inner hair cells and afferent nerve fibers (ANFs) in the cochlea (Furman et al., 2013; Liberman & Kujawa, 2017). This phenomenon would be more likely to occur in synapses connected to nerve fibers with a low spontaneous spike rate (SR) (Furman et al., 2013). Compared to high-SR fibers, they have higher thresholds and a wider dynamic range, being sensitive to suprathreshold coding (Bharadwaj et al., 2014; Bourien et al., 2014; Furman et al., 2013). This suprathreshold coding is important for speech perception in noise and would be impaired in CS, while audiometric thresholds, determined by high-SR fibers, remain unaffected. Synaptopathy typically develops due to aging, after extensive noise exposure, or due to ototoxicity (Liberman & Kujawa, 2017; Sergeyenko et al., 2013). Since tinnitus is often reported in cases of age related, noise induced or ototoxic hearing loss, with sometimes normal hearing thresholds, the link between tinnitus and cochlear synaptopathy is worth considering (Bhatt et al., 2016; Hackenberg et al., 2023; Knipper et al., 2013; Oosterloo et al., 2021).

In animals, CS can be determined post mortem by counting presynaptic vesicles and postsynaptic auditory nerve endings (Kujawa & Liberman, 2009). In humans, non-invasive electrophysiological measurements are used to determine synaptic loss. Several early markers of peripheral hearing loss have been proposed to map CS. A first marker concerns extended high frequency (EHF) audiometric thresholds, which are known to be increased due to age, noise exposure and ototoxicity, before affecting audiometric thresholds in the standard frequency range (Liberman et al., 2016; Mehrparvar et al., 2011). Secondly, based on the findings that CS would typically affect the temporal envelope (TENV) encoding of speech, the envelope following response (EFR), generated by amplitude modulated signals, is currently considered a promising objective EEG test for hidden hearing loss (Bramhall, Beach, et al., 2019; Shaheen et al., 2015; Vasilkov et al., 2021; Verhulst et al., 2018). A last marker that is considered as a potential marker for cochlear synaptopathy, is the wave-I amplitude of the auditory brainstem response (ABR) at suprathreshold level (Furman et al., 2013; Kujawa & Liberman, 2015; Schaette & McAlpine, 2011).

Besides the ABR wave I, also wave V is used in both animal and human studies to demonstrate the central gain effect, which is assumed to be associated with tinnitus (Auerbach et al., 2014; Chen et al., 2021;

Johannesen & Lopez-Poveda, 2021; Schaette & McAlpine, 2011). Human measurements indicate a significant reduction in the amplitude of wave I, but normal or even increased amplitudes of wave V in individuals with tinnitus and normal audiometric thresholds (Bramhall et al., 2018; Chen et al., 2021; Schaette & McAlpine, 2011). Correspondingly, animal studies of Auerbach et al. (2014) revealed a decreased afferent input in the auditory nerve and cochlear nucleus, while the neural activity of the central auditory structures, including the inferior colliculus, the medial geniculate body, and the auditory cortex, paradoxically increased. For the measurement of central gain using the ABR in humans, ratios of wave V/I and wave I/V are commonly reported (Chen et al., 2021; Grose et al., 2019; Möhrle et al., 2016; Sergeyenko et al., 2013).

However, both CS and the central gain effect have also been observed as a result of aging (Chambers et al., 2016; Grose et al., 2019; Johannesen & Lopez-Poveda, 2021; Möhrle et al., 2016; Sergeyenko et al., 2013). Age-effects were differentiated from tinnitus-effects in the ABR-study from Johannesen and Lopez-Poveda (2021), who concluded that the central gain effect is rather age-related and not associated with tinnitus. To unravel the influences of age and tinnitus, our study compared two young and two older groups, each with and without tinnitus. Our objective was to investigate the link between tinnitus and hidden hearing loss, especially CS, by considering three early markers of hidden peripheral hearing loss among individuals with normal hearing thresholds. Additionally, we assessed speech encoding as a more functional indicator of hidden hearing loss.

## 2 Materials and methods

### 2.1 *Participants and audiometric thresholds*

This study included five different test groups: young normal hearing without tinnitus (yNHnoT), young normal hearing with tinnitus (yNHT), older normal hearing without tinnitus (oNHnoT), older normal hearing with tinnitus (oNHT) and an older hearing-impaired group with tinnitus (oHIT) (see

). The first four groups had (nearly) normal audiometric thresholds (see Figure 1) with a pure tone average (PTA; mean 1, 2, and 4 kHz)  $\leq 20$  dB HL. Frequency specific thresholds were maximum 35 dB HL until 4 kHz and max 55 dB HL until 8 kHz. Despite slightly elevated thresholds in some older patients compared to the younger groups, we still refer to this group as normal hearing in this study, because they can be considered normal according to age. However, this study primarily focuses on tinnitus-related differences within age groups to avoid confounding factors such as hidden hearing loss and cognitive decline associated with aging. When interpreting differences between the young and older normal-hearing groups, we take into account these small audiometric differences. The fifth group with significant hearing loss existed of three subjects and was not included for statistical analysis due to the small group size, but are individually shown in the figures. Hearing thresholds were measured using the modified Hughson-Westlake method. Participants were seated in a double-walled, sound-attenuated booth, and stimuli were presented by an Equinox Interacoustics audiometer on the conventional (half-)octave frequencies (0.125, 0.25, 0.5, 1, 2, 3, 4, 6 and 8 kHz) and EHF of 10, 12.5, 14 and 16 kHz, through Interacoustics TDH-39 headphones and circumoral Sennheiser HAD-200 headphones respectively. Conductive hearing losses and middle/outer ear pathologies were excluded based on tympanometry and audiometric air bone gaps when air conduction thresholds exceeded 20 dB HL. Bone conduction was measured with an Interacoustics bone vibrator placed on the mastoid to calculate the air bone gap. If this gap was 15 dB HL or more, participants were excluded from the study. For the remainder of the protocol, only the best ear (based on overall thresholds) was measured. In the three subjects with unilateral tinnitus, the tinnitus ear was chosen.

Exclusion criteria were a history of chronic otitis media, head trauma, ear surgery, retrocochlear lesions, endolymphatic hydrops, congenital malformations of the ear, neurological disorders and use of ototoxic medication. The inclusion criterium for subjects with tinnitus was the presence of chronic tinnitus for minimal 6 months. Participants were not allowed to be exposed to noise (concert, party, personal audio player) for at least 24 hours before participation.

All procedures were performed in compliance with relevant laws and institutional guidelines and have been approved by the ethical committee at Ghent University hospital (BC-00993-E05, 14/09/2020). Participants signed an informed consent before the experiment.

## 2.2 *Questionnaires*

Before the start of the experiment, all participants filled in a questionnaire that included following topics: (i) general sociodemographic questions, (ii) subjective hearing difficulties, (iii) tinnitus and (iv) noise exposure and use of hearing protection. Participants with tinnitus filled in the Dutch version of following questionnaires assessing tinnitus and hyperacusis:

- The Tinnitus Sample Case History Questionnaire (TSCHQ) questions the history and characteristics of the tinnitus, including family history, onset, type of sound, laterality, loudness, pitch... (Langguth et al., 2007).
- The Tinnitus Handicap Inventory (THI) consists of 25 items divided into three subscales: functional (12 items), emotional (8 items) and catastrophic (5 items). Questions could be answered with 'yes' (4 points), 'sometimes' (2 points), or 'no' (0 points). The total score classifies individuals according to degrees of symptom severity: slight (0 to 16), mild (18 to 36), moderate (38 to 56), severe (58 to 76) and catastrophic (78 to 100) (Newman et al., 2008).
- The Tinnitus Functional Index (TFI) consists of 25 items divided into 8 subscales: intrusiveness, sense of control, cognitive interference, sleep disturbance, auditory issues, relaxation, quality of life and emotional distress. Subjects responded using a 11-point visual analogue scale except for two questions rated between 0 and 100% that require a transformation from percentage to a 11-point scale. A total score of 26 or higher indicates that tinnitus has a significant impact on the person's life. This questionnaire determines the severity of the tinnitus as well as the negative impact the person is experiencing (Meikle et al., 2012; Rabau et al., 2014).
- The Hyperacusis Questionnaire (HQ) consists of 14 questions that can be answered with 'not true', 'sometimes true', 'often true', 'always true' (4-point Likert scale). Hyperacusis would be present in subjects with a score of 28 or more (Khalfa et al., 2002; Meeus et al., 2010).

## 2.3 *Early markers of peripheral hearing damage*

In addition to EHF audiometry, two electro-encephalography (EEG) based markers were measured. EFR and ABR stimuli were presented in alternating polarity and were delivered monaurally using an intelligent hearing systems 2-channel opti-amp with ER-2 loudspeakers. Electrodes were placed on Fz (non-inverting electrode (+)), on the ipsi and contralateral lobule (inverting electrodes (-)) and on Fpz near the nasion (ground electrode). Subjects were seated in a comfortable relax-chair while watching a muted video and were instructed to relax as much as possible, while remaining awake. Both ears were covered with earmuffs and all lights and nonessential electrical devices were turned off during the measurements. In addition, otoacoustic emissions (DPOAEs) were measured, but could not be included in further analysis due to calibration changes between measurements.

### 2.3.1 EFR

Since low-SR fibers are typically specialized in temporal envelope (TENV) encoding (Bharadwaj et al., 2014), the EFR focuses on the encoding of TENV using 110-Hz rectangular amplitude-modulated (RAM) pure tones as a stimulus (70 dB SPL, 4-kHz carrier, 500-ms epochs, 1000 repetitions, 100% modulated, 25 % duty cycle) (Van Der Biest et al., 2023; Vasilkov et al., 2021). The recordings were band-pass filtered using an 800th order FIR filter (30-1500 Hz) in a 0-phase filtering procedure, epoched and baseline corrected. A bootstrapping approach was applied in the frequency domain to estimate the noise-floor and variability of the EFR (Keshishzadeh et al., 2020). EFR magnitudes were calculated as the sum of the signal-to-noise spectral magnitude at the fundamental frequency and its following three harmonics, i.e. 110, 220, 330 and 440 Hz (Van Der Biest et al., 2023; Vasilkov et al., 2021).

### 2.3.2 ABR

ABRs were collected at 80 and 100 dB peSPL, using 11-Hz 80- $\mu$ s clicks (4000 repetitions) and recordings were band-pass filtered (10-1500 Hz) using the same filter as for the EFR recordings, epoched and baseline corrected. The epochs were averaged to obtain the ABR waveform in which waves I, III, V and VI were manually peak-picked by trained audiologists to identify the respective ABR peak to baseline amplitudes.

## 2.4 *Speech (in noise) test*

Based on the physiological evidence discussed by Verschooten et al. (2019) and the binaural human phase-locking limit near 1.5 kHz (Brughera et al., 2013), we assume that human TENV coding dominates over temporal fine structure (TFS) coding for high frequencies. With this assumption, we investigated speech intelligibility using low-frequency (<1.5 kHz) and high-frequency (>1.65 kHz) filtered speech, which would provide either predominant TFS or TENV cues respectively. Speech intelligibility was quantified with the speech reception threshold (SRT) using the Apex-3 test platform (Francart et al., 2008). The tests were performed monaurally (to the ear with the best audiometric thresholds) with Sennheiser HD-300 headphones and a Fireface UCX soundcard. The Flemish 5-word Matrix sentence test (Luts et al., 2014) was conducted in an adaptive tracking procedure to determine the SRT. The following conditions were tested with or without stationary speech-shaped background noise of 70 dB SPL: broadband (BB) filtered, low-pass (LP) filtered (1.5-kHz 1024th order FIR filter) and high-pass (HP) filtered (1.65-kHz 1024th order FIR filter).

## 2.5 *Statistics*

EEG data was analyzed using MATLAB and all statistical analyses were performed with Python. Depending on the normality of the variables, based on the Shapiro Wilk test, parametric or nonparametric group statistics were performed. Four comparisons were included:

- yNHnoT with yNHT to verify the tinnitus-related effect in the younger group.
- oNHnoT with oNHT to verify the tinnitus-related effect in the older group.
- yNHnoT with oNHnoT to verify any age-related effect.
- yNHT with oNHT to verify any age-related effect.

A two-sided independent Student's t-test or Mann-Whitney U test was performed, with a Bonferroni correction that brought the significance level to  $\alpha=0.0125$ . To verify a linear relationship between two continuous variables, depending on their normality, the Pearson or Spearman correlation coefficient was calculated and corresponding p-values were reported with a significance level of  $\alpha=0.05$ .

### 3 Results

#### 3.1 *Tinnitus questionnaires*

Results of the main tinnitus-related questionnaire items are summarized in

. Tinnitus duration was significantly shorter in the young tinnitus group (yNHT) compared to the older group (oNHT) ( $t(21) = -2.837$ ;  $p = 0.01$ ), while tinnitus loudness did not differ significantly ( $p > 0.05$ ). Analysis of the THI and TFI scores revealed no significant differences in tinnitus distress between the two groups, even for their separate subcategories ( $p > 0.05$ ). In addition, hyperacusis scores based on the HQ questionnaire, did not differ significantly between our two groups ( $p > 0.05$ ).

#### 3.2 *Early markers of peripheral hearing damage*

##### 3.2.1 *EHF audiometry*

The first considered marker is the mean hearing threshold across EHF. Significant age-related differences were observed, with better thresholds for the young group without tinnitus, compared to the older group without tinnitus ( $t(26) = -6.52$ ;  $p = 0.0000$ ) (see Figure 2c). This age-related effect was also present between the two groups with tinnitus ( $t(24) = -7.23$ ;  $p = 0.0000$ ). Nevertheless, no tinnitus-related effects were found since there were no significant differences between yNHnoT and yNHT, nor between oNHnoT and oNHT ( $p > 0.05$ ). For the standard audiometric frequencies, similar results were observed when considering the mean of the low frequencies (Figure 2a; yNHnoT and oNHnoT:  $t(26) = -3.78$ ;  $p = 0.0008$ ; yNHT and oNHT:  $t(24) = -3.30$ ;  $p = 0.0030$ ) and the high frequencies (Figure 2b; yNHnoT and oNHnoT:  $t(26) = -5.54$ ;  $p = 0.0000$ ; yNHT and oNHT:  $t(24) = -6.38$ ;  $p = 0.0000$ ).

##### 3.2.2 *EFR*

Similar to the EHF audiometry findings, only age-related effects were observed for EFR magnitudes in both tinnitus and non-tinnitus groups (Figure 3). The yNHnoT group showed significantly better EFR-magnitudes compared to the oNHnoT group ( $t(26) = 4.76$ ;  $p = 0.0001$ ) and the yNHT group scored significantly better than oNHT ( $t(22) = 4.60$ ;  $p = 0.0001$ ). No tinnitus-related differences were found when comparing the tinnitus and non-tinnitus groups within young and older participants separately ( $p > 0.05$ ).

##### 3.2.3 *ABR*

An approximation of the average ABR waveforms at 80 dB peSPL are visualized in Figure 4a, utilizing the group means of the indicated peak and through values. Differences in amplitudes and latencies of peak wave I and V were analyzed at both 80 and 100 dB peSPL. At 80 dB peSPL, age-related amplitude decreases were observed for wave I among older participants compared to the young ones in the non-tinnitus groups ( $t(25) = 2.71$ ;  $p = 0.0121$ ), as well as in the tinnitus groups ( $t(24) = 4.97$ ;  $p = 0.0000$ ) (see Figure 4b). Confirming the previous discussed markers, no significant tinnitus-related differences were detected ( $p > 0.05$ ). Additionally, wave-I latencies at 80 dB peSPL were not significantly different and at 100 dB peSPL, wave I showed no group-differences in amplitude, nor in latency ( $p > 0.05$ ).

The wave-V amplitude at 80 dB peSPL was significantly different between the young and older group without tinnitus, again indicating an age-related effect ( $t(26) = 3.46$ ;  $p = 0.0019$ ) (Figure 4c). No other significant amplitude differences were found at 80 or 100 dB peSPL after Bonferroni correction ( $p > 0.0125$ ). In contrast to wave I, wave V showed significant latency differences related to age, with the young tinnitus group showing shorter latencies at 80 dB peSPL than the older group ( $t(24) = -3.06$ ;  $p = 0.0053$ ). At 100 dB peSPL, no significant amplitude or latency differences were observed after Bonferroni correction

( $p > 0.0125$ ). Consistent with the previous analyses, no tinnitus-related differences were observed for wave V at either intensity level ( $p > 0.05$ ).

In Figure 4d, the ABR wave-I/V ratio was compared between the test groups, with lower values representing more central gain. Differences were found at 80 dB peSPL between the young and older groups within the tinnitus and non-tinnitus groups separately, but these were not significant after Bonferroni correction ( $p > 0.0125$ ). At 100 dB, no significant differences were observed ( $p > 0.05$ ).

### 3.3 *Speech encoding*

Speech perception in quiet (SPIQ) was evaluated in a LP- and HP-filtered condition. No group differences were found in the LP condition (cutoff 1500 Hz; Figure 5a), but significant differences were observed in the HP condition (cutoff 1650 Hz; Figure 5b). These differences were age-related with young participants performing better than the older in both the tinnitus ( $t(26) = -4.33$ ;  $p = 0.0002$ ) and non-tinnitus groups ( $t(23) = -3.98$ ;  $p = 0.0006$ ). These HP SPIQ scores correlated strongly to the mean audiometric thresholds at high frequencies over all groups (2000-8000 Hz;  $\rho = 0.8019$ ;  $p = 0.0000$ ).

Speech perception in noise (SPIN) was evaluated in three conditions: LP, BB and HP. Again, age was found to have a significant impact on performance, with the young groups scoring better than the older groups in the HP condition for both non-tinnitus ( $t(26) = -4.36$ ;  $p = 0.0002$ ) and tinnitus groups ( $t(24) = -3.09$ ;  $p = 0.0050$ ) (Figure 5f). In the BB condition, young participants also scored better, but only in the non-tinnitus groups ( $t(26) = -2.84$ ;  $p = 0.0086$ ) (Figure 5e). Surprisingly, a tinnitus-related difference surfaced in the LP condition, with older participants with tinnitus (oNHT) scoring significantly better than the older without tinnitus (oNHnoT) ( $t(21) = 2.91$ ;  $p = 0.0084$ ), and performing equally well as the young groups ( $p > 0.05$ ) (Figure 5d). While HP SPIN correlated with mean high-frequency audiometric thresholds ( $\rho = 0.5460$ ;  $p = 0.0000$ ), the low-pass condition did not correlate with the mean low-frequency audiometric thresholds, nor did it correlate with LP SPIQ, age, EHF audiometry, ABR amplitudes at 80 and 100 dB peSPL or EFR magnitudes at 4000Hz ( $p > 0.05$ ).

### 3.4 *Link between speech-in-noise intelligibility and tinnitus distress*

#### 3.4.1 *Tinnitus Handicap Inventory (THI)*

The THI questionnaire, assessing tinnitus distress, revealed significant correlations within the older group (Figure 6a). Higher THI scores correlated with better LP SPIN ( $r = -0.6862$ ;  $p = 0.0137$ ), a trend not observed in the younger group ( $p > 0.05$ ). Further exploration into THI subscales highlighted significant correlations in the older tinnitus group for the functional ( $r = -0.6715$ ;  $p = 0.0168$ ) and emotional subscale ( $r = -0.7429$ ;  $p = 0.0056$ ), but not for catastrophic subscale ( $p > 0.05$ ) scores. No correlations were found between THI scores and other speech conditions, nor for the subscales ( $p > 0.05$ ).

#### 3.4.2 *Tinnitus Functional Index (TFI)*

Also the TFI scores represent tinnitus distress and showed a significant correlation with LP SPIN in the older group ( $r = -0.7843$ ;  $p = 0.0025$ ; see Figure 6b). When splitting up in subscales, this link was especially present for the relaxation ( $\rho = -0.8035$ ;  $p = 0.0016$ ) and emotional subscale ( $\rho = -0.5937$ ;  $p = 0.0418$ ), with the latter also correlating in the young group ( $\rho = -0.6056$ ;  $p = 0.0217$ ). The other subscales showed similar trends without reaching statistical significance ( $p > 0.05$ ). No correlations were observed between TFI scores and other speech conditions, nor for the subscales ( $p > 0.05$ ).

### 3.4.3 *Hyperacusis Questionnaire (HQ)*

No significant correlations were found between HQ scores and LP SPIN ( $p > 0.005$ ). Based on the cutoff of 28, the group was split into tinnitus patients with and without hyperacusis and visually compared with the non-tinnitus group scores in Figure 6c. Group statistics were not performed due to the small groups sizes when splitting up for hyperacusis. Nevertheless, notable trends emerged since older participants with both tinnitus and hyperacusis appear to score better on LP SPIN than both groups without hyperacusis. Similarly, in the young groups, improved scores were visually observed for the hyperacusis group, despite the wide range of LP SPIN scores in the non-tinnitus group. Additionally, only in the young group, HQ scores were correlated with BB SPIN ( $r = -0.7582$ ;  $p = 0.0017$ ). No other correlations between HQ scores and other speech conditions were observed ( $p > 0.05$ ).

## 4 Discussion

The contribution of peripheral hidden hearing loss in the pathogenesis of tinnitus remains unclear. Generally, hidden hearing loss was considered as a plausible explanation, especially in individuals with normal hearing thresholds. This study explored the occurrence of hidden hearing loss in tinnitus patients by measuring three potential markers: EHF audiometry, EFR, and ABR wave I. Additionally, we investigated the phenomenon of enhanced central gain through the ABR wave-I/V ratio and assessed speech intelligibility as a functional indicator of hidden hearing loss. Normal hearing groups with and without tinnitus were subdivided in young and older participants to consider age-related effects of hidden hearing loss.

### 4.1 *Cochlear synaptopathy does not seem to be the driving force behind tinnitus.*

By subdividing the groups by age, this study revealed no statistically significant tinnitus-related differences in any of the markers associated with peripheral hidden hearing loss. However, significant differences were observed between the younger and older groups for all markers, which could be explained by age-related effects such as hidden hearing loss or higher hearing thresholds. Cochlear synaptopathy could be an explaining factor, since EFR-magnitudes were smaller in the older groups (Vasilkov et al., 2021). Nevertheless, the lack of significant differences between tinnitus and non-tinnitus groups, suggests that tinnitus is not associated with hidden hearing loss or CS. Rather, reduced CS-markers seem to be associated with age-related factors. This is consistent with the findings of Johannesen and Lopez-Poveda (2021), who attributed differences in ABR amplitudes to age rather than tinnitus. Consistent with our findings, studies that only included young, normal-hearing subjects showed no differences in ABR and EFR between individuals with and without tinnitus (Gilles et al., 2016; Guest et al., 2017).

Nevertheless, other studies did reveal decreases in electrophysiological markers related to tinnitus. Paul et al. (2017) observed reduced EFR responses in subjects with tinnitus, while they considered age by only including young adults. A possible explanation for these different findings could be the EFR stimulus characteristics. In comparison to the referenced study, we utilized a higher modulation rate of 110 Hz, which is more reflective of activity closer to the auditory nerve. Lower rates, such as 85 Hz in Paul et al. (2017), are typically associated with midbrain responses. These reduced responses towards more cortical regions were also observed assessing cortical auditory evoked potentials (Cardon et al., 2022). Additionally, we presented a RAM-stimulus instead of the sinusoidal modulation envelope used in Paul et al. (2017), because RAM-stimuli are less sensitive to OHC-damage and more sensitive to CS (Vasilkov et al., 2021). Also Schaeffe and McAlpine (2011) observed, contrary to our findings, reduced ABR wave-I amplitudes in subjects with tinnitus. This may be explained by the slightly older young groups (around 35



years) or again by potential OHC damage. Previous studies have shown that ABR wave I is also affected by OHC damage, measurable by OAEs (Vasilkov & Verhulst, 2019; Verhulst et al., 2016). However, OAEs were not measured in either study. Although DPOAEs were measured in our study, they could not be included in the analyses due to calibration changes between measurements. However, future electrophysiological studies should include OAEs to examine the effects of OHC loss, since this is typically associated with tinnitus (Degeest et al., 2014).

Gilles et al. (2016) did include TEOAE and DPOAE measurements in combination with ABR and found no significant group differences in either measurement. Contrary, Bramhall et al. (2018) found significant tinnitus-related differences in young participants for both DPOAE and 4 kHz tone burst ABR. This ABR wave-I reduction remained after adjusting for DPOAE levels. In a following study that included larger groups with a greater age range, they concluded that both ABR wave I and DPOAEs could be associated with greater probability of tinnitus (Bramhall, McMillan, et al., 2019). EFR measurements were not included, nor were tinnitus or hyperacusis questionnaires collected in that study. Taking this study into account, the frequency specificity of our electrophysiological markers may also explain the lack of tinnitus-related differences. The click ABR represented frequencies between 1000 and 4000 Hz, whereas EFR only represented 4000 Hz. Future research could focus on measuring EFR and tone-burst ABR around the tinnitus pitch.

In addition to the three markers discussed, the middle ear muscle reflex (MEMR) has been suggested as a possible marker for CS (Bharadwaj et al., 2019). Mixed results have been found using this technique in tinnitus studies (Casolani et al., 2022; Guest et al., 2019; Wojtczak et al., 2017). Also with this marker of hidden hearing loss, age and OHC damage should be considered as possible confounders. Further investigation is needed to determine the link between MEMR and tinnitus, in combination with electrophysiological measurements to prove a relation between CS and tinnitus. A recent tinnitus study by Vasilkov et al. (2023) included both ABR and MEMR measurements, revealing significant group differences for both markers. However, this study covered a wide age range, from 18 to 72 years old, and only considered age based on hearing thresholds, overlooking potential insights related to hidden hearing loss and cochlear synaptopathy within the examined cohorts.

Additionally to the ABR wave-I analysis, central gain was evaluated using the wave-I/V ratio. Although not significant, only age-related group differences were observed for this I/V ratio. This aligns again with the findings of Johannesen and Lopez-Poveda (2021), concluding that ABR-based central gain is associated with age rather than tinnitus. Harris et al. (2022) investigated this age-related central gain effect, identifying hyperexcitability in cortical activity despite reduced AN input. This effect was related to lower cortical GABA levels and poorer SPIN, independent from hearing thresholds (Harris et al., 2022). Also Gu et al. (2012) also addressed the importance of age in their ABR study, noting that older subjects (around 40 years of age) showed reduced ABR wave I amplitudes compared to a younger group (around 20 years of age). This study did reveal a central gain effect at high click intensities of 80 dB nHL, corresponding to 120 dB peSPL, in older subjects with tinnitus. However, young subjects with tinnitus were not included in this study.

#### 4.2 TFS coding may be an overlooked factor in tinnitus research.

As a functional representation of hidden-hearing-loss complaints, speech-(in-noise) intelligibility was examined. Besides the observed age-related reduction in HP-filtered speech, older individuals with tinnitus showed significantly improved LP SPIN scores compared to those without tinnitus. Curiously, these

scores did not correlate with hearing thresholds or electrophysiological measures. Instead, a significant correlation was found with tinnitus distress, based on the THI and TFI questionnaires. This correlation may imply that individuals with higher tinnitus distress were more focused on, or more sensitive to LP-SPIN information. The HP-filtered SPIN condition did not yield a similar tinnitus-related effect, suggesting that a low-frequency cue would be responsible for these findings. Age-related differences, as observed in the HP condition, can be attributed to several factors, such as higher hearing thresholds, hidden hearing loss, or cognitive decline associated with aging. Explaining these differences is beyond the scope of this study. However, our tinnitus-related difference in LP SPIN scores within the older group cannot be attributed to age-related confounding factors since no significant differences were observed in parameters for hidden hearing loss and audiometric thresholds.

The LP and HP filtering of the speech understanding tests was chosen to distinguish between TFS and TENV processing. It is hypothesized that for LP stimuli, humans utilize both TFS and TENV information, while for HP stimuli, one is restricted to TENV information due to the human phase locking limit at 1500 Hz (Bharadwaj et al., 2014; Brughera et al., 2013; Joris et al., 2004; Verschooten et al., 2019). Based on the age-related reduction that we observed in HP SPIN and EFR measurements, we suggest that older participants had worse TENV encoding. Since this reduction in TENV encoding was observed in both older groups with and without tinnitus, we suggest that our observed tinnitus-related difference could be explained by TFS processing. Given that this improvement in SPIN was only observed in the LP condition, we hypothesize that older individuals with tinnitus may rely more strongly on TFS information than older subjects without tinnitus.

This improved TFS encoding could be related to the findings of Bureš et al. (2019), who reported elevated scores in detecting suprathreshold intensity changes in their tinnitus group, indicating a heightened sensitivity to suprathreshold temporal encoding. Similarly, Zeng et al. (2020) observed enhanced scores in intensity discrimination, while frequency discrimination was poorer in the tinnitus group. Correlations between these psychoacoustic tests and THI-scores were not examined, nor were hyperacusis questionnaires incorporated. Suprathreshold TFS and TENV encoding should be further explored in future tinnitus studies. Moon et al. (2015) already performed TFS and TENV-related psychoacoustic measurements in their study, making interaural comparisons within unilateral and bilateral tinnitus patients. However, their study lacked a non-tinnitus reference group for comparison with our findings.

Although there is a lack of TFS-related research in tinnitus, many studies have already focused on speech understanding. Contrary to our findings, several studies have reported reduced speech understanding in normal hearing patients with tinnitus, particularly in noisy environments (Gilles et al., 2016; Ivansic et al., 2017; Jagoda et al., 2018; Sommerhalder et al., 2023). The variability in results across studies may be due to different speech stimuli, noise conditions, the influence of cognitive factors, and heterogeneity of the tinnitus groups (Ivansic et al., 2017; Tai & Husain, 2019). None of these studies applied filtering to speech stimuli or attempted to address TFS coding. One study did perform a test using LP filtered monosyllabic words to address temporal lobe dysfunction, with a 500 Hz cutoff (Goldstein & Shulman, 1999). However, this stimuli and objective was not comparable with the filtered sentence test at 1500 Hz cutoff that we used to address TFS encoding. Larger sample sizes are needed to further investigate the link between tinnitus distress and improved speech comprehension, which was not the objective of this study. Future studies should explore the use of LP and HP filtering on speech in noise tests to confirm our results in a more extensive cohort. Also, the role of attention and other cognitive mechanisms necessary for understanding LP SPIN and related to tinnitus, should be further explored.

#### 4.3 Also hyperacusis could explain improved speech in noise scores.

An alternative explanation for the improved LP SPIN scores may be associated with hyperacusis. Despite the limited sample size, the grouping based on the HQ suggests that individuals with hyperacusis tend to score better on the LP SPIN test compared to both the non-tinnitus group and the tinnitus group without hyperacusis. This trend could suggest that individuals with hyperacusis may be particularly sensitive to low-frequency sound, in contrast to the high-frequency reductions in dynamic range that are typically observed in these patients. Auerbach et al. (2014) performed a comprehensive study on neural central gain enhancement and reported that loss of inhibition and enhanced central gain could especially be visible in low frequencies at the colliculus inferior. Since our electrophysiological measurements were based on high-frequency stimuli, further exploration of low frequency encoding could be valuable in tinnitus research.

Since THI, TFI and HQ all seem to be related to improved LP SPIN, it is difficult to attribute the improved LP SPIN scores to either tinnitus distress or hyperacusis. Previous studies on hyperacusis have consistently shown elevated THI and TFI scores, indicating that tinnitus distress and hyperacusis are related to each other (Degeest et al., 2016; Fioretti et al., 2013; Jacquemin et al., 2022). These higher THI and TFI scores were also visible in our older groups with hyperacusis, despite the small group size. As hyperacusis is reported in approximately 40% of tinnitus subjects, more comprehensive studies are needed to distinguish between subgroups with and without tinnitus, and with and without hyperacusis (Ralli et al., 2017).

Recent literature highlights the importance of distinguishing between tinnitus with and without hyperacusis. For example, Refat et al. (2021) showed contrasting results of ABR-amplitudes when comparing tinnitus subjects with and without hyperacusis to a non-tinnitus reference group. Hyperacusis participants exhibited stronger wave-V amplitudes, while participants with only tinnitus showed lower amplitudes. Zeng (2020) proposed different models for hyperacusis and non-hyperacusis, indicating that tinnitus may result from additive central noise due to traditional hearing loss, while hyperacusis occurs with steeper loudness growth due to central gain enhancement from hidden hearing loss. Similarly, Chen et al. (2021) proposed a model in which tinnitus is accounted for by central enhancement at low levels, and therefore high-SR fibers, while hyperacusis is contributed to by neural gain at high levels, and thus low-SR fibers. Future research should include tinnitus subjects with or without hyperacusis, as well as hyperacusis subjects without tinnitus. Furthermore, the use of extended hyperacusis questionnaires, such as the Hyperacusis Impact Questionnaire and the Inventory of Hyperacusis Symptoms, would improve the understanding of the interplay between tinnitus and hyperacusis (Aazh et al., 2022; Greenberg & Carlos, 2018).

## **5 Conclusion**

This study examined the relationship between tinnitus and potential markers for hidden hearing loss, namely EHF thresholds, ABR wave I amplitude and EFR magnitude. The results showed clear age-related effects in peripheral hidden hearing loss markers, while no significant tinnitus-related differences were observed. Based on these findings, cochlear synaptopathy does not seem to be the driving force behind tinnitus. Only for LP SPIN, improved scores were observed for the older tinnitus subjects compared to the older group without tinnitus. Based on this exploratory data, we hypothesize that the improved LP SPIN scores in tinnitus patients could be explained by TFS- or hyperacusis-related mechanisms. Based on these findings, we propose the following recommendations for future research:

- When performing electrophysiological measurements on participants with tinnitus, hidden hearing loss due to age should be taken into account. Incorporating age grouping into study designs can eliminate confounding factors such as hidden hearing loss and cochlear synaptopathy.
- Future studies on tinnitus should include measurements for low-frequency encoding, and more specifically TFS coding. A more detailed exploration of TFS coding can contribute significantly to unraveling the mechanisms underlying tinnitus and hyperacusis.
- Beside tinnitus complaints, also hyperacusis symptoms should be assessed thoroughly in future research. This requires grouping based on hyperacusis and tinnitus and including detailed hyperacusis questionnaires.

## 6 Acknowledgement

We thank Emma De Smet and Neri Spitaels for patient recruitment and data-collection as part of their Msc studies in audiology at Ghent University.

## 7 Formatting of funding sources

Work supported by Horizon 2020 ERC-StG 678120 RobSpear; and FWO G068621N AuDiMod.

## 8 Autor contributions

Conceptualization (SV, HK), Methodology (SV, SK, HK), Formal analysis (SK, SV, HK, BT, PD), Writing – original draft (PD), Writing – review & editing (HK, ID, SV), Funding acquisition (SV)

## 9 Bibliography

- Aazh, H., Hayes, C., Moore, B. C., Danesh, A. A., & Vitoratou, S. (2022). Psychometric evaluation of the Hyperacusis Impact Questionnaire (HIQ) and Sound Sensitivity Symptoms Questionnaire (SSSQ) using a clinical population of adult patients with tinnitus alone or combined with hyperacusis. *Journal of the American Academy of Audiology*, 33(05), 248-258.
- Auerbach, B. D., Rodrigues, P. V., & Salvi, R. J. (2014). Central gain control in tinnitus and hyperacusis. *Frontiers in Neurology*, 5, 206. <https://www.ncbi.nlm.nih.gov/pmc/articles/PMC4208401/pdf/fneur-05-00206.pdf>
- Bharadwaj, H. M., Mai, A. R., Simpson, J. M., Choi, I., Heinz, M. G., & Shinn-Cunningham, B. G. (2019). Non-invasive assays of cochlear synaptopathy—candidates and considerations. *Neuroscience*, 407, 53-66. <https://www.ncbi.nlm.nih.gov/pmc/articles/PMC6513698/pdf/nihms-1523484.pdf>
- Bharadwaj, H. M., Verhulst, S., Shaheen, L., Liberman, M. C., & Shinn-Cunningham, B. G. (2014). Cochlear neuropathy and the coding of supra-threshold sound. *Frontiers in Systems Neuroscience*, 8, 26. <https://www.ncbi.nlm.nih.gov/pmc/articles/PMC3930880/pdf/fnsys-08-00026.pdf>
- Bhatt, J. M., Lin, H. W., & Bhattacharyya, N. (2016). Prevalence, severity, exposures, and treatment patterns of tinnitus in the United States. *JAMA Otolaryngology–Head & Neck Surgery*, 142(10), 959-965.
- Bourien, J., Tang, Y., Batrel, C., Huet, A., Lenoir, M., Ladrech, S., Desmadryl, G., Nouvian, R., Puel, J.-L., & Wang, J. (2014). Contribution of auditory nerve fibers to compound action potential of the auditory nerve. *Journal of Neurophysiology*, 112(5), 1025-1039. <https://journals.physiology.org/doi/pdf/10.1152/jn.00738.2013>
- Bramhall, N., Beach, E., Epp, B., Le Prell, C. G., Lopez-Poveda, E. A., Plack, C. J., Schaette, R., Verhulst, S., & Canlon, B. (2019). The search for noise-induced cochlear synaptopathy in humans: Mission impossible? *Hearing Research*, 377, 88-103. <https://www.sciencedirect.com/science/article/pii/S037859551830546X?via%3Dihub>

- Bramhall, N., Konrad-Martin, D., & McMillan, G. P. (2018). Tinnitus and auditory perception after a history of noise exposure: Relationship to auditory brainstem response measures. *Ear and Hearing, 39*(5), 881.
- Bramhall, N., McMillan, G. P., Gallun, F. J., & Konrad-Martin, D. (2019). Auditory brainstem response demonstrates that reduced peripheral auditory input is associated with self-report of tinnitus. *The Journal of the Acoustical Society of America, 146*(5), 3849-3862.
- Brughera, A., Dunai, L., & Hartmann, W. M. (2013). Human interaural time difference thresholds for sine tones: The high-frequency limit. *The Journal of the Acoustical Society of America, 133*(5), 2839-2855. [https://www.ncbi.nlm.nih.gov/pmc/articles/PMC3663869/pdf/JASMAN-000133-002839\\_1.pdf](https://www.ncbi.nlm.nih.gov/pmc/articles/PMC3663869/pdf/JASMAN-000133-002839_1.pdf)
- Bureš, Z., Profant, O., Svobodová, V., Tóthová, D., Vencovský, V., & Syka, J. (2019). Speech comprehension and its relation to other auditory parameters in elderly patients with tinnitus. *Frontiers in Aging Neuroscience, 11*, 219.
- Cardon, E., Vermeersch, H., Joossen, I., Jacquemin, L., Mertens, G., Vanderveken, O. M., Lammers, M. J., Van de Heyning, P., Van Rompaey, V., & Gilles, A. (2022). Cortical auditory evoked potentials, brain signal variability and cognition as biomarkers to detect the presence of chronic tinnitus. *Hearing Research, 420*, 108489. <https://www.sciencedirect.com/science/article/pii/S0378595522000600?via%3Dihub>
- Casolani, C., Harte, J. M., & Epp, B. (2022). Categorization of tinnitus listeners with a focus on cochlear synaptopathy. *PloS One, 17*(12), e0277023. <https://doi.org/10.1371/journal.pone.0277023>
- Cederroth, C. R., Gallus, S., Hall, D. A., Kleinjung, T., Langguth, B., Maruotti, A., Meyer, M., Norena, A., Probst, T., & Pryss, R. (2019). Towards an understanding of tinnitus heterogeneity. *Frontiers in Aging Neuroscience, 11*, 53. <https://www.ncbi.nlm.nih.gov/pmc/articles/PMC6433929/pdf/fnagi-11-00053.pdf>
- Chambers, A. R., Resnik, J., Yuan, Y., Whitton, J. P., Edge, A. S., Liberman, M. C., & Polley, D. B. (2016). Central gain restores auditory processing following near-complete cochlear denervation. *Neuron, 89*(4), 867-879. <https://www.ncbi.nlm.nih.gov/pmc/articles/PMC4760846/pdf/nihms748936.pdf>
- Chen, F., Zhao, F., Mahafza, N., & Lu, W. (2021). Detecting noise-induced cochlear synaptopathy by auditory brainstem response in tinnitus patients with normal hearing thresholds: A meta-analysis. *Frontiers in Neuroscience, 15*, 778197. <https://www.ncbi.nlm.nih.gov/pmc/articles/PMC8721093/pdf/fnins-15-778197.pdf>
- De Ridder, D., Schlee, W., Vanneste, S., Londero, A., Weisz, N., Kleinjung, T., Shekhawat, G. S., Elgoyhen, A. B., Song, J.-J., Andersson, G., Adhia, D., De Azevedo, A. A., Baguley, D. M., Biesinger, E., Binetti, A. C., Del Bo, L., Cederroth, C. R., Cima, R., Eggermont, J. J., . . . Langguth, B. (2021). Tinnitus and tinnitus disorder: Theoretical and operational definitions (an international multidisciplinary proposal). In (pp. 1-25). Elsevier. <https://doi.org/10.1016/bs.pbr.2020.12.002>
- De Ridder, D., Vanneste, S., Weisz, N., Londero, A., Schlee, W., Elgoyhen, A. B., & Langguth, B. (2014). An integrative model of auditory phantom perception: tinnitus as a unified percept of interacting separable subnetworks. *Neuroscience and Biobehavioral Reviews, 44*, 16-32.
- Degeest, S., Corthals, P., Dhooge, I., & Keppler, H. (2016). The impact of tinnitus characteristics and associated variables on tinnitus-related handicap. *The Journal of Laryngology & Otology, 130*(1), 25-31.
- Degeest, S., Corthals, P., Vinck, B., & Keppler, H. (2014). Prevalence and characteristics of tinnitus after leisure noise exposure in young adults. *Noise and Health, 16*(68), 26-33.
- Fioretti, A. B., Fusetti, M., & Eibenstein, A. (2013). Association between sleep disorders, hyperacusis and tinnitus: evaluation with tinnitus questionnaires. *Noise and Health, 15*(63), 91-95.

- Francart, T., Van Wieringen, A., & Wouters, J. (2008). APEX 3: a multi-purpose test platform for auditory psychophysical experiments. *Journal of Neuroscience Methods*, 172(2), 283-293. <https://www.sciencedirect.com/science/article/pii/S0165027008002513?via%3Dihub>
- Furman, A. C., Kujawa, S. G., & Liberman, M. C. (2013). Noise-induced cochlear neuropathy is selective for fibers with low spontaneous rates. *Journal of Neurophysiology*, 110(3), 577-586. <https://doi.org/10.1152/jn.00164.2013>
- Gilles, A., Schlee, W., Rabau, S., Wouters, K., Franssen, E., & Van de Heyning, P. (2016). Decreased Speech-In-Noise Understanding in Young Adults with Tinnitus [Original Research]. *Frontiers in Neuroscience*, 10. <https://doi.org/10.3389/fnins.2016.00288>
- Goldstein, B., & Shulman, A. (1999). Central auditory speech test findings in individuals with subjective idiopathic tinnitus. *International Tinnitus Journal*, 5(1), 16-19.
- Greenberg, B., & Carlos, M. (2018). Psychometric properties and factor structure of a new scale to measure hyperacusis: introducing the inventory of hyperacusis symptoms. *Ear and Hearing*, 39(5), 1025-1034.
- Grose, J. H., Buss, E., & Elmore, H. (2019). Age-related changes in the auditory brainstem response and suprathreshold processing of temporal and spectral modulation. *Trends in Hearing*, 23, 2331216519839615. [https://www.ncbi.nlm.nih.gov/pmc/articles/PMC6463337/pdf/10.1177\\_2331216519839615.pdf](https://www.ncbi.nlm.nih.gov/pmc/articles/PMC6463337/pdf/10.1177_2331216519839615.pdf)
- Gu, J. W., Herrmann, B. S., Levine, R. A., & Melcher, J. R. (2012). Brainstem auditory evoked potentials suggest a role for the ventral cochlear nucleus in tinnitus. *Journal of the Association for Research in Otolaryngology*, 13, 819-833.
- Guest, H., Munro, K. J., & Plack, C. J. (2019). Acoustic middle-ear-muscle-reflex thresholds in humans with normal audiograms: No relations to tinnitus, speech perception in noise, or noise exposure. *Neuroscience*, 407, 75-82. <https://www.sciencedirect.com/science/article/pii/S0306452218308285?via%3Dihub>
- Guest, H., Munro, K. J., Prendergast, G., Howe, S., & Plack, C. J. (2017). Tinnitus with a normal audiogram: Relation to noise exposure but no evidence for cochlear synaptopathy. *Hearing Research*, 344, 265-274. <https://doi.org/10.1016/j.heares.2016.12.002>
- Hackenberg, B., O'Brien, K., Döge, J., Lackner, K. J., Beutel, M. E., Münzel, T., Pfeiffer, N., Schulz, A., Schmidtman, I., & Wild, P. S. (2023). Tinnitus Prevalence in the Adult Population—Results from the Gutenberg Health Study. *Medicina*, 59(3), 620. [https://mdpi-res.com/d\\_attachment/medicina/medicina-59-00620/article\\_deploy/medicina-59-00620-v2.pdf?version=1679375107](https://mdpi-res.com/d_attachment/medicina/medicina-59-00620/article_deploy/medicina-59-00620-v2.pdf?version=1679375107)
- Harris, K. C., Dias, J. W., McClaskey, C. M., Rumschlag, J., Prisciandaro, J., & Dubno, J. R. (2022). Afferent loss, GABA, and Central Gain in older adults: Associations with speech recognition in noise. *Journal of Neuroscience*, 42(38), 7201-7212. <https://www.ncbi.nlm.nih.gov/pmc/articles/PMC9512571/pdf/zns7201.pdf>
- Ivancic, D., Guntinas-Lichius, O., Müller, B., Volk, G. F., Schneider, G., & Döbel, C. (2017). Impairments of speech comprehension in patients with tinnitus—a review. *Frontiers in Aging Neuroscience*, 9, 224. <https://www.ncbi.nlm.nih.gov/pmc/articles/PMC5504093/pdf/fnagi-09-00224.pdf>
- Jacquemin, L., Cardon, E., Michiels, S., Luyten, T., Van der Wal, A., De Hertogh, W., Vanderveken, O. M., Van de Heyning, P., Lammers, M. J., & Van Rompaey, V. (2022). Hyperacusis: demographic, audiological, and clinical characteristics of patients at the ENT department. *European Archives of Oto-Rhino-Laryngology*, 279(10), 4899-4907.
- Jagoda, L., Giroud, N., Neff, P., Kegel, A., Kleinjung, T., & Meyer, M. (2018). Speech perception in tinnitus is related to individual distress level-A neurophysiological study. *Hearing Research*, 367, 48-58. <https://www.sciencedirect.com/science/article/pii/S0378595518301023?via%3Dihub>

- Jarach, C. M., Lugo, A., Scala, M., van den Brandt, P. A., Cederroth, C. R., Odone, A., Garavello, W., Schlee, W., Langguth, B., & Gallus, S. (2022). Global prevalence and incidence of tinnitus: A systematic review and meta-analysis. *JAMA neurology*.
- Jastreboff, P. J. (1990). Phantom auditory perception (tinnitus): mechanisms of generation and perception. *Neuroscience Research*, 8(4), 221-254.
- Johannesen, P. T., & Lopez-Poveda, E. A. (2021). Age-related central gain compensation for reduced auditory nerve output for people with normal audiograms, with and without tinnitus. *IScience*, 24(6), 102658. <https://www.ncbi.nlm.nih.gov/pmc/articles/PMC8192693/pdf/main.pdf>
- Joris, P. X., Schreiner, C. E., & Rees, A. (2004). Neural processing of amplitude-modulated sounds. *Physiological Reviews*, 84(2), 541-577. <https://journals.physiology.org/doi/pdf/10.1152/physrev.00029.2003>
- Keshishzadeh, S., Garrett, M., Vasilkov, V., & Verhulst, S. (2020). The derived-band envelope following response and its sensitivity to sensorineural hearing deficits. *Hearing Research*, 392, 107979. <https://www.sciencedirect.com/science/article/pii/S0378595519305064?via%3Dihub>
- Khalifa, S., Isabelle, P., Jean-Pierre, B., & Manon, R. (2002). Event-related skin conductance responses to musical emotions in humans. *Neuroscience Letters*, 328(2), 145-149. <https://www.sciencedirect.com/science/article/pii/S0304394002004627?via%3Dihub>
- Knipper, M., Van Dijk, P., Nunes, I., Rüttiger, L., & Zimmermann, U. (2013). Advances in the neurobiology of hearing disorders: recent developments regarding the basis of tinnitus and hyperacusis. *Progress in Neurobiology*, 111, 17-33. <https://www.sciencedirect.com/science/article/pii/S0301008213000804?via%3Dihub>
- Kujawa, S. G., & Liberman, M. C. (2009). Adding Insult to Injury: Cochlear Nerve Degeneration after “Temporary” Noise-Induced Hearing Loss. *The Journal of Neuroscience*, 29(45), 14077-14085. <https://doi.org/10.1523/jneurosci.2845-09.2009>
- Kujawa, S. G., & Liberman, M. C. (2015). Synaptopathy in the noise-exposed and aging cochlea: Primary neural degeneration in acquired sensorineural hearing loss. *Hearing Research*, 330, 191-199. <https://www.ncbi.nlm.nih.gov/pmc/articles/PMC4567542/pdf/nihms671500.pdf>
- Langguth, B., Goodey, R., Azevedo, A., Bjorne, A., Cacace, A., Crocetti, A., Del Bo, L., De Ridder, D., Diges, I., & Elbert, T. (2007). Consensus for tinnitus patient assessment and treatment outcome measurement: Tinnitus Research Initiative meeting, Regensburg, July 2006. *Progress in Brain Research*, 166, 525-536. <https://www.ncbi.nlm.nih.gov/pmc/articles/PMC4283806/pdf/nihms305162.pdf>
- Liberman, M. C., Epstein, M. J., Cleveland, S. S., Wang, H., & Maison, S. F. (2016). Toward a differential diagnosis of hidden hearing loss in humans. *PloS One*, 11(9), e0162726. <https://journals.plos.org/plosone/article/file?id=10.1371/journal.pone.0162726&type=printable>
- Liberman, M. C., & Kujawa, S. G. (2017). Cochlear synaptopathy in acquired sensorineural hearing loss: Manifestations and mechanisms. *Hearing Research*, 349, 138-147. <https://www.ncbi.nlm.nih.gov/pmc/articles/PMC5438769/pdf/nihms842458.pdf>
- Luts, H., Jansen, S., Dreschler, W., & Wouters, J. (2014). Development and normative data for the Flemish/Dutch Matrix test.
- McCormack, A., Edmondson-Jones, M., Somerset, S., & Hall, D. (2016). A systematic review of the reporting of tinnitus prevalence and severity. *Hearing Research*, 337, 70-79. <https://www.sciencedirect.com/science/article/pii/S0378595516300272?via%3Dihub>
- Meeus, O. M., Spaepen, M., Ridder, D. D., & Heyning, P. H. V. d. (2010). Correlation between hyperacusis measurements in daily ENT practice. *International Journal of Audiology*, 49(1), 7-13.
- Mehrpour, A. H., Mirmohammadi, S. J., Ghoreyshi, A., Mollasadeghi, A., & Loukazadeh, Z. (2011). High-frequency audiometry: a means for early diagnosis of noise-induced hearing loss. *Noise and Health*, 13(55), 402.

- Meikle, M. B., Henry, J. A., Griest, S. E., Stewart, B. J., Abrams, H. B., McArdle, R., Myers, P. J., Newman, C. W., Sandridge, S., & Turk, D. C. (2012). The tinnitus functional index: development of a new clinical measure for chronic, intrusive tinnitus. *Ear and Hearing, 33*(2), 153-176.
- Möhrle, D., Ni, K., Varakina, K., Bing, D., Lee, S. C., Zimmermann, U., Knipper, M., & Rüttiger, L. (2016). Loss of auditory sensitivity from inner hair cell synaptopathy can be centrally compensated in the young but not old brain. *Neurobiology of Aging, 44*, 173-184. <https://www.sciencedirect.com/science/article/pii/S0197458016300628?via%3Dihub>
- Moon, I. J., Won, J. H., Kang, H. W., Kim, D. H., An, Y.-H., & Shim, H. J. (2015). Influence of tinnitus on auditory spectral and temporal resolution and speech perception in tinnitus patients. *Journal of Neuroscience, 35*(42), 14260-14269. <https://www.ncbi.nlm.nih.gov/pmc/articles/PMC6605422/pdf/zns14260.pdf>
- Newman, C. W., Sandridge, S. A., & Bolek, L. (2008). Development and psychometric adequacy of the screening version of the tinnitus handicap inventory. *Otology & Neurotology, 29*(3), 276-281.
- Oosterloo, B. C., Croll, P. H., Baatenburg de Jong, R. J., Ikram, M. K., & Goedegebure, A. (2021). Prevalence of tinnitus in an aging population and its relation to age and hearing loss. *Otolaryngology–Head and Neck Surgery, 164*(4), 859-868. [https://www.ncbi.nlm.nih.gov/pmc/articles/PMC8027937/pdf/10.1177\\_0194599820957296.pdf](https://www.ncbi.nlm.nih.gov/pmc/articles/PMC8027937/pdf/10.1177_0194599820957296.pdf)
- Paul, B. T., Bruce, I. C., & Roberts, L. E. (2017). Evidence that hidden hearing loss underlies amplitude modulation encoding deficits in individuals with and without tinnitus. *Hearing Research, 344*, 170-182.
- Rabau, S., Wouters, K., & Van de Heyning, P. (2014). Validation and translation of the Dutch tinnitus functional index. *B-ent, 10*(4), 251-258.
- Ralli, M., Salvi, R. J., Greco, A., Turchetta, R., De Virgilio, A., Altissimi, G., Attanasio, G., Cianfrone, G., & De Vincentiis, M. (2017). Characteristics of somatic tinnitus patients with and without hyperacusis. *PLoS One, 12*(11), e0188255.
- Refat, F., Wertz, J., Hinrichs, P., Klose, U., Samy, H., Abdelkader, R. M., Saemisch, J., Hofmeier, B., Singer, W., & Rüttiger, L. (2021). Co-occurrence of hyperacusis accelerates with tinnitus burden over time and requires medical care. *Frontiers in Neurology, 12*, 627522. <https://www.ncbi.nlm.nih.gov/pmc/articles/PMC8012887/pdf/fneur-12-627522.pdf>
- Roberts, L. E., & Salvi, R. (2019). Overview: Hearing loss, tinnitus, hyperacusis, and the role of central gain. In (Vol. 407, pp. 1-7).
- Sanchez, T. G., Medeiros, Í. R. T. d., Levy, C. P. D., Ramalho, J. d. R. O., & Bento, R. F. (2005). Tinnitus in normally hearing patients: clinical aspects and repercussions. *Revista Brasileira de Otorrinolaringologia, 71*, 427-431.
- Schaette, R., & McAlpine, D. (2011). Tinnitus with a Normal Audiogram: Physiological Evidence for Hidden Hearing Loss and Computational Model. *Journal of Neuroscience, 31*(38), 13452-13457. <https://doi.org/10.1523/jneurosci.2156-11.2011>
- Sergeyenko, Y., Lall, K., Liberman, M. C., & Kujawa, S. G. (2013). Age-Related Cochlear Synaptopathy: An Early-Onset Contributor to Auditory Functional Decline. *Journal of Neuroscience, 33*(34), 13686-13694. <https://doi.org/10.1523/jneurosci.1783-13.2013>
- Shaheen, L. A., Valero, M. D., & Liberman, M. C. (2015). Towards a Diagnosis of Cochlear Neuropathy with Envelope Following Responses. *16*(6), 727-745. <https://doi.org/10.1007/s10162-015-0539-3>
- Sommerhalder, N., Neff, P., Bureš, Z., Profant, O., Kleinjung, T., & Meyer, M. (2023). Deficient Central Mechanisms in Tinnitus: Exploring the Impact on Speech Comprehension and Executive Functions. *Hearing Research, 108914*.
- Tai, Y., & Husain, F. T. (2019). The role of cognitive control in tinnitus and its relation to speech-in-noise performance. *Journal of audiology & otology, 23*(1), 1.



- Van Der Biest, H., Keshishzadeh, S., Keppler, H., Dhooge, I., & Verhulst, S. (2023). Envelope following responses for hearing diagnosis: Robustness and methodological considerations. *The Journal of the Acoustical Society of America*, 153(1), 191-208. <https://doi.org/10.1121/10.0016807>
- Vasilkov, V., Caswell-Midwinter, B., Zhao, Y., De Gruttola, V., Jung, D. H., Liberman, M. C., & Maison, S. F. (2023). Evidence of cochlear neural degeneration in normal-hearing subjects with tinnitus. *Scientific Reports*, 13(1). <https://doi.org/10.1038/s41598-023-46741-5>
- Vasilkov, V., Garrett, M., Mauermann, M., & Verhulst, S. (2021). Enhancing the sensitivity of the envelope-following response for cochlear synaptopathy screening in humans: The role of stimulus envelope. *Hearing Research*, 400, 108132. <https://www.sciencedirect.com/science/article/pii/S0378595520304032?via%3Dihub>
- Vasilkov, V., & Verhulst, S. (2019). Towards a differential diagnosis of cochlear synaptopathy and outer-hair-cell deficits in mixed sensorineural hearing loss pathologies. *medRxiv*, 19008680.
- Verhulst, S., Altoe, A., & Vasilkov, V. (2018). Computational modeling of the human auditory periphery: Auditory-nerve responses, evoked potentials and hearing loss. *Hearing Research*, 360, 55-75. <https://www.sciencedirect.com/science/article/pii/S0378595517303477?via%3Dihub>
- Verhulst, S., Jagadeesh, A., Mauermann, M., & Ernst, F. (2016). Individual differences in auditory brainstem response wave characteristics: relations to different aspects of peripheral hearing loss. *Trends in Hearing*, 20, 2331216516672186. [https://www.ncbi.nlm.nih.gov/pmc/articles/PMC5117250/pdf/10.1177\\_2331216516672186.pdf](https://www.ncbi.nlm.nih.gov/pmc/articles/PMC5117250/pdf/10.1177_2331216516672186.pdf)
- Verschooten, E., Shamma, S., Oxenham, A. J., Moore, B. C., Joris, P. X., Heinz, M. G., & Plack, C. J. (2019). The upper frequency limit for the use of phase locking to code temporal fine structure in humans: A compilation of viewpoints. *Hearing Research*, 377, 109-121. <https://www.sciencedirect.com/science/article/pii/S0378595518305604?via%3Dihub>
- Wojtczak, M., Beim, J. A., & Oxenham, A. J. (2017). Weak Middle-Ear-Muscle Reflex in Humans with Noise-Induced Tinnitus and Normal Hearing May Reflect Cochlear Synaptopathy. *eneuro*, 4(6). <https://doi.org/10.1523/eneuro.0363-17.2017>
- Zeng, F.-G. (2013). An active loudness model suggesting tinnitus as increased central noise and hyperacusis as increased nonlinear gain. *Hearing Research*, 295, 172-179.
- Zeng, F.-G. (2020). Tinnitus and hyperacusis: central noise, gain and variance. *Current opinion in physiology*, 18, 123-129. <https://www.ncbi.nlm.nih.gov/pmc/articles/PMC7720792/pdf/nihms-1646480.pdf>
- Zeng, F.-G., Richardson, M., & Turner, K. (2020). Tinnitus does not interfere with auditory and speech perception. *Journal of Neuroscience*, 40(31), 6007-6017. <https://www.ncbi.nlm.nih.gov/pmc/articles/PMC7392513/pdf/zns6007.pdf>

Table 1: Mean demographic characteristics of the five test groups.

| Group  | n                    | Age (years): min-max [m(SD)] | Test-ear: n(%)    | PTA (dB HL): m(SD) |
|--------|----------------------|------------------------------|-------------------|--------------------|
| yNHnoT | 17 (10 women, 7 men) | 20-24 [22.71 (0.849)]        | 5 right (29.41%)  | 0.59 (3.022)       |
| yNHT   | 14 (12 women, 2 men) | 20-25 [22.71 (1.437)]        | 10 right (71.43%) | 1.78 (3.241)       |
| oNHnoT | 11 (8 women, 3 men)  | 40-55 [49.91 (5.127)]        | 6 right (54.55%)  | 8.18 (4.844)       |
| oNHT   | 12 (7 women, 5 men)  | 41-55 [47.83 (6.235)]        | 9 right (75.00%)  | 12.08 (3.975)      |
| oHIT   | 3 (1 woman, 2 men)   | 53-55 [54.00 (1.000)]        | 1 right (33.33%)  | 31.67 (5.932)      |

PTA = Pure Tone Average of 1, 2 and 4 kHz; yNHnoT = young normal hearing without tinnitus; yNHT = young normal hearing with tinnitus; oNHnoT = older normal hearing without tinnitus; oNHT = older normal hearing with tinnitus; oHIT = older hearing impaired with tinnitus.

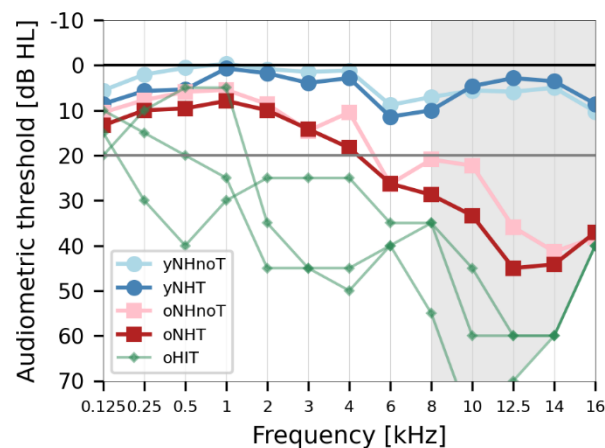

Figure 1: Averaged tonal audiograms per test group and individual audiograms for the three participants with hearing loss. The gray area indicates extended high frequencies, which were limited to 70 dB at 12.5 kHz, to 60 dB at 14 kHz and to 40 dB at 16 kHz. yNHnoT = young normal hearing without tinnitus; yNHT = young normal hearing with tinnitus; oNHnoT = older normal hearing without tinnitus; oNHT = older normal hearing with tinnitus; oHIT = older hearing impaired with tinnitus.

Table 2: Tinnitus characteristics and questionnaire results of the two groups with tinnitus

|                                                 | Subcategories          | yNHT (N=14)   | oNHT (N=12)   |
|-------------------------------------------------|------------------------|---------------|---------------|
| Tinnitus duration (years): m(SD)                |                        | 5.38 (4.91)   | 14.10 (9.61)  |
| VAS tinnitus loudness (0-100): m(SD)            |                        | 28.50 (20.33) | 46.09 (22.87) |
| Tinnitus onset: n(%)                            | Sudden                 | 6 (42.86)     | 6 (50.00)     |
|                                                 | Gradual                | 8 (57.14)     | 6 (50.00)     |
| Tinnitus laterality: n(%)                       | Bilateral/ in the head | 13 (92.86)    | 10 (83.33)    |
|                                                 | Unilateral right       | 1 (7.14)      | 0 (0.00)      |
|                                                 | Unilateral left        | 0 (0.00)      | 2 (16.67)     |
| Tinnitus tonality: n(%)                         | Tone-like              | 7 (50.00)     | 9 (75.00)     |
|                                                 | Noise-like             | 6 (42.86)     | 2 (16.67)     |
|                                                 | Other (crickets)       | 1 (7.14)      | 1 (8.33)      |
| Tinnitus pitch: n(%)<br>(subjective estimation) | Low                    | 1 (7.14)      | 1 (8.33)      |
|                                                 | Medium                 | 1 (7.14)      | 2 (16.67)     |
|                                                 | High                   | 6 (42.86)     | 7 (58.33)     |
|                                                 | Very high              | 6 (42.86)     | 2 (16.67)     |
| THI questionnaire: n(%)                         | Slight (0-16)          | 7 (50.00)     | 4 (33.33)     |
|                                                 | Mild (18-36)           | 5 (35.71)     | 6 (50.00)     |
|                                                 | Moderate (38-56)       | 1 (7.14)      | 2 (16.67)     |
|                                                 | Severe (58-100)        | 1 (7.14)      | 0 (0.00)      |
| TFI questionnaire: n(%)                         | Mild (0-25)            | 12 (85.71)    | 9 (75.00)     |
|                                                 | Significant (26-50)    | 1 (7.14)      | 3 (25.00)     |
|                                                 | Severe (51-100)        | 1 (7.14)      | 0 (0.00)      |
| HQ questionnaire: n(%)                          | No hyperacusis (0-27)  | 7 (50.00)     | 3 (25.00)     |
|                                                 | Hyperacusis (28-42)    | 7 (50.00)     | 9 (75.00)     |

yNHT = young normal hearing with tinnitus; oNHT = old normal hearing with tinnitus; VAS = Visual Analogue Scale; THI = Tinnitus Handicap Inventory; TFI = Tinnitus Functional Index; HQ = Hyperacusis Questionnaire

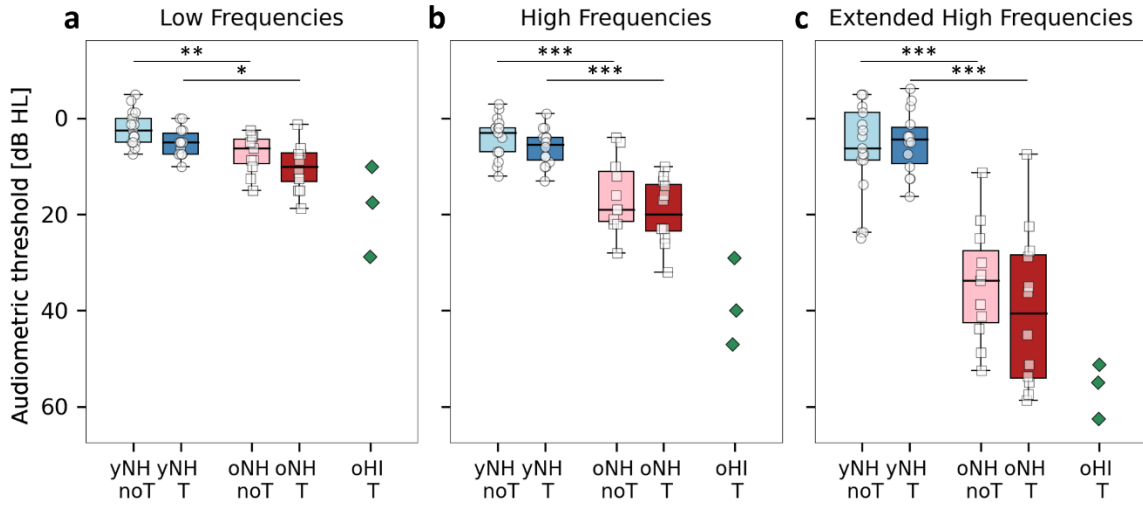

Figure 2: Boxplots of (a) the mean of the low frequent audiometric thresholds (125, 250, 500 and 1000 Hz), (b) the mean of the high frequent audiometric thresholds (2000, 3000, 4000, 6000 and 8000 Hz) and (c) the mean of the extended high frequency (EHF) audiometric thresholds (10, 12.5, 14 and 16 kHz) for each test group. yNHnoT = young normal hearing without tinnitus; yNHT = young normal hearing with tinnitus; oNHnoT = older normal hearing without tinnitus; oNHT = older normal hearing with tinnitus; oHIT = older hearing impaired with tinnitus (not included in statistics). \* $p \leq 0.0125$ ; \*\* $p \leq 0.001$ ; \*\*\* $p \leq 0.0001$ .

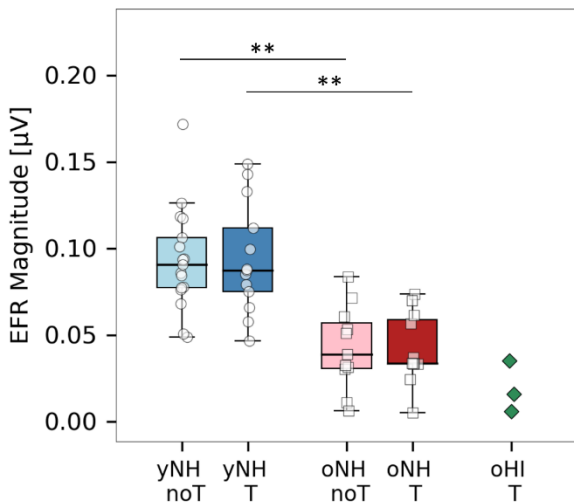

Figure 3: Boxplots of the envelope following response at 4000 Hz for each test group. yNHnoT = young normal hearing without tinnitus; yNHT = young normal hearing with tinnitus; oNHnoT = older normal hearing without tinnitus; oNHT = older normal hearing with tinnitus; oHIT = older hearing impaired with tinnitus (not included in statistics). \* $p \leq 0.0125$ ; \*\* $p \leq 0.001$ ; \*\*\* $p \leq 0.0001$ .

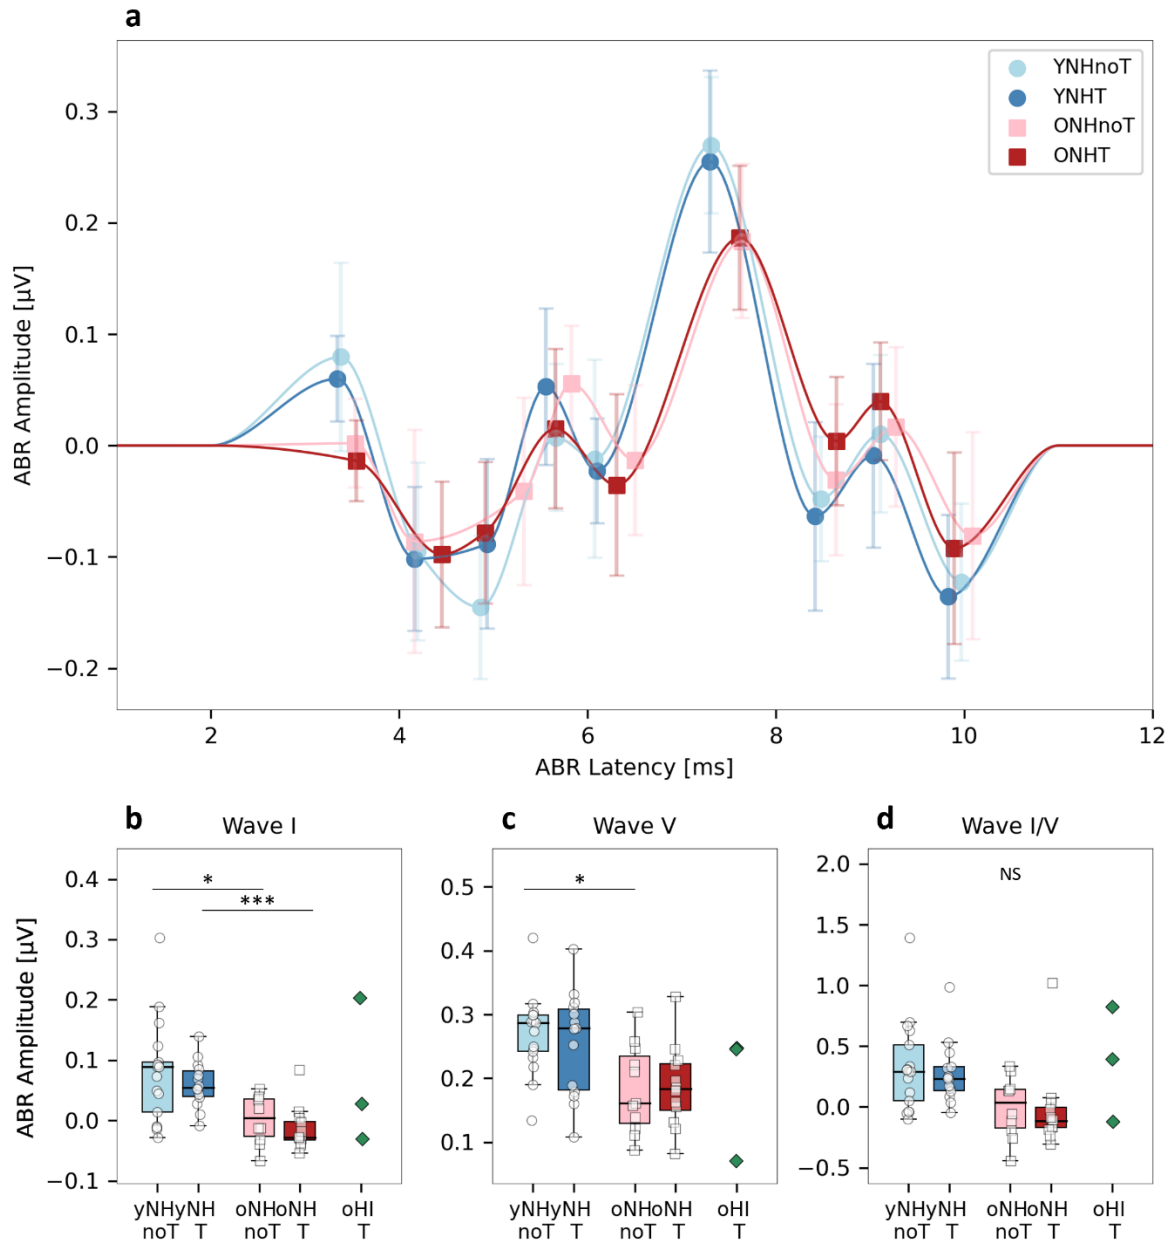

Figure 4: Auditory brainstem responses (ABR) with an 80 dB peSPL click (a) Mean ABR-peak and -through values per test group with curved lines fitted to these mean points (P1, N1, N2, P3, N3, P5, N5, P6, N6). (b) Boxplot of the positive wave-I (P1) amplitudes for each test group. (c) Boxplot of the positive wave-V (P5) amplitudes for each test group. (d) Boxplot of the wave-I/V ratio for each test group. yNHnoT = young normal hearing without tinnitus; yNHT = young normal hearing with tinnitus; ONHnoT = older normal hearing without tinnitus; ONHT = older normal hearing with tinnitus; oHI = older hearing impaired with tinnitus (not included in statistics). \* $p \leq 0.0125$ ; \*\* $p \leq 0.001$ ; \*\*\* $p \leq 0.0001$ ; NS = not significant

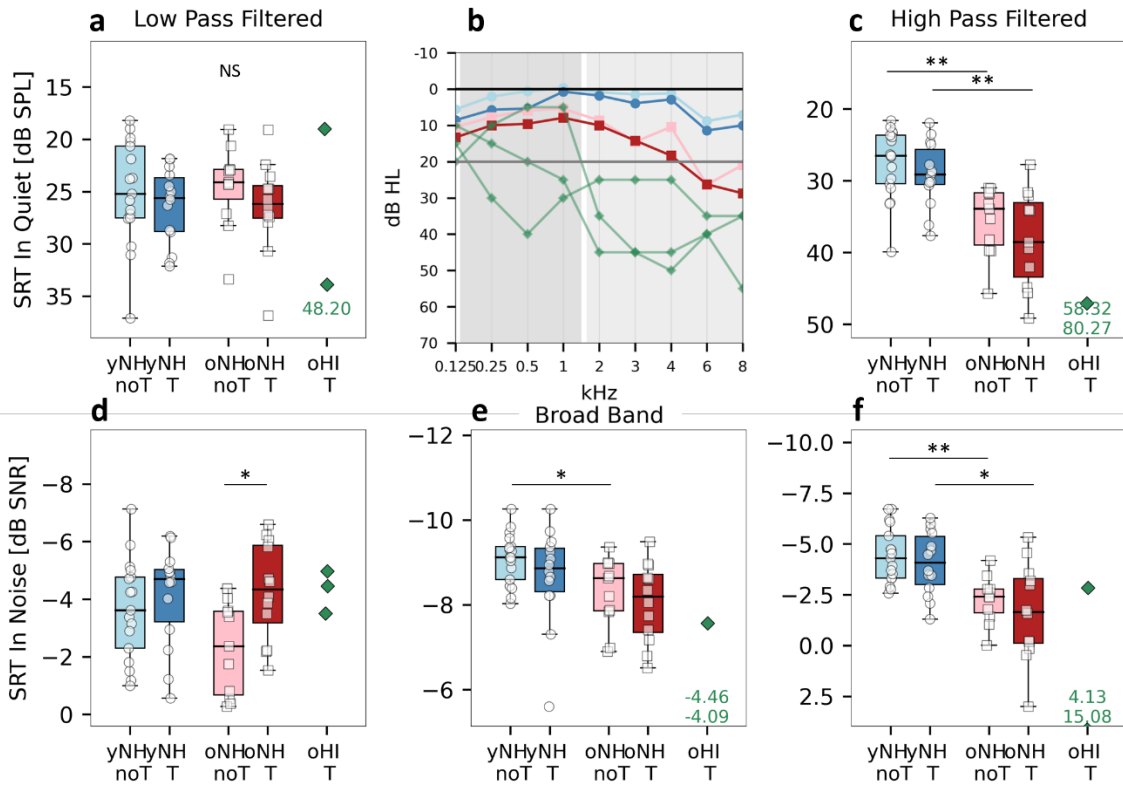

Figure 5: (a) Boxplot of the low-pass (LP) filtered speech in quiet test; (b) Audiogram of the test groups with LP and high-pass (HP) filtered areas marked; (c) Boxplot of the HP filtered speech in quiet test; (d) Boxplot of the LP filtered speech in noise test; (e) Boxplot of the non-filtered (BB) speech in noise test; (f) Boxplot of the HP filtered speech in noise test; all compared between test group. SRT = Speech Reception Threshold; yNHnoT = young normal hearing without tinnitus; yNHT = young normal hearing with tinnitus; oNHnoT = older normal hearing without tinnitus; oNHT = older normal hearing with tinnitus; oHIT = older hearing impaired with tinnitus (not included in statistics, outliers below window indicated with their values). \* $p \leq 0.0125$ ; \*\* $p \leq 0.001$ ; \*\*\* $p \leq 0.0001$ ; NS = not significant.

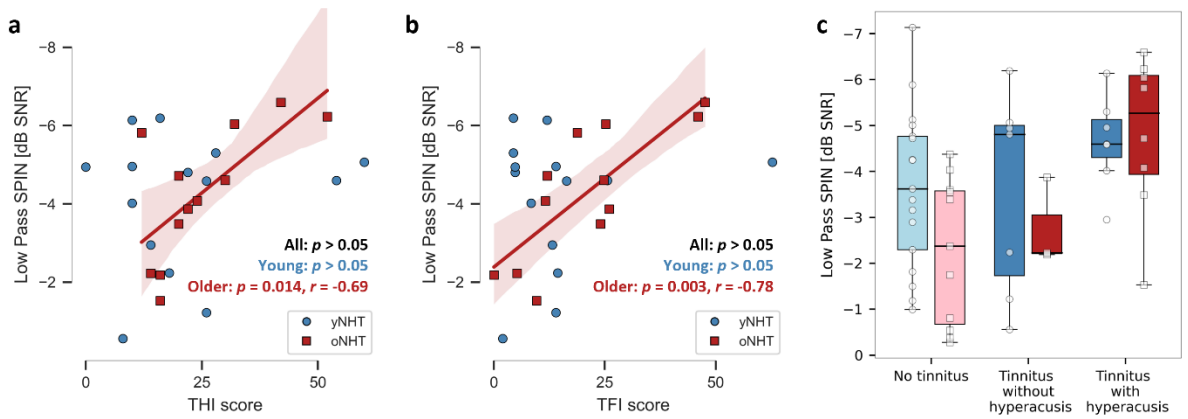

Figure 6: Scatter plots of the relation between low-pass filtered speech-in-noise (SPIN) scores and (a) Tinnitus Handicap Inventory (THI) scores and (b) Tinnitus Functional Index (TFI) scores. (c) Boxplots of low-pass-filtered SPIN scores for the groups without tinnitus, the tinnitus groups without hyperacusis based on the hyperacusis questionnaire (cutoff 28) and the tinnitus groups with hyperacusis, split between young (circles, 7 without hyperacusis and 7 with hyperacusis) and older participants (squares, 3 without hyperacusis and 9 with hyperacusis). yNHnoT = young normal hearing without tinnitus; yNHT = young normal hearing with tinnitus; oNHnoT = older normal hearing without tinnitus; oNHT = older normal hearing with tinnitus.
